# Supplementary material for: A comprehensive map of human glucokinase variant activity
Source: PubMed Central journal article supplement (PMC10131484; doi:10.1186/s13059-023-02935-8), 2023-04-26
Supplement: 13059_2023_2935_MOESM3_ESM.pdf [file 13059_2023_2935_MOESM3_ESM.pdf]

Fig. S1

GFP/GCK

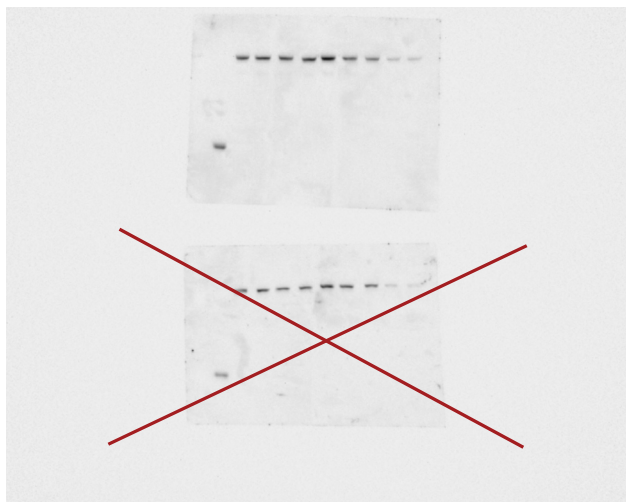

marker

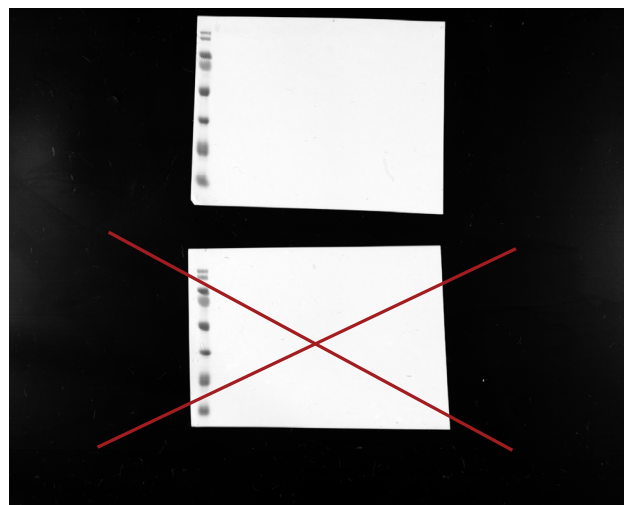

merge

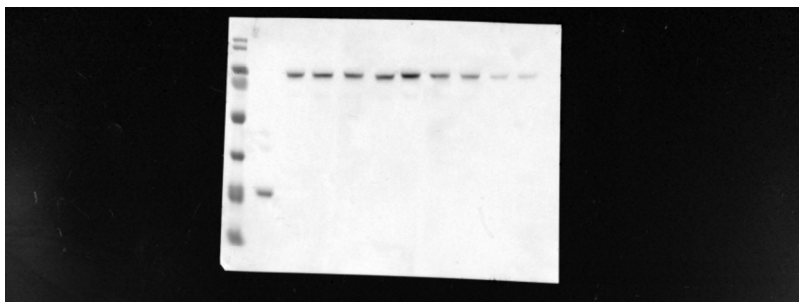

Ponceau S

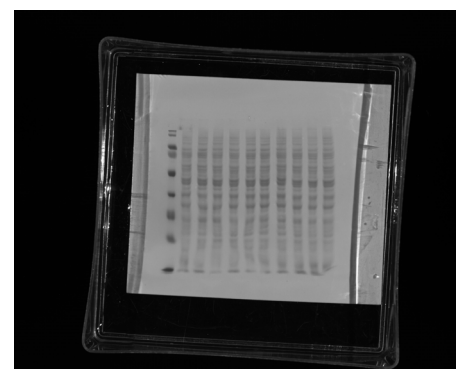

Fig. S2

GFP/GCK

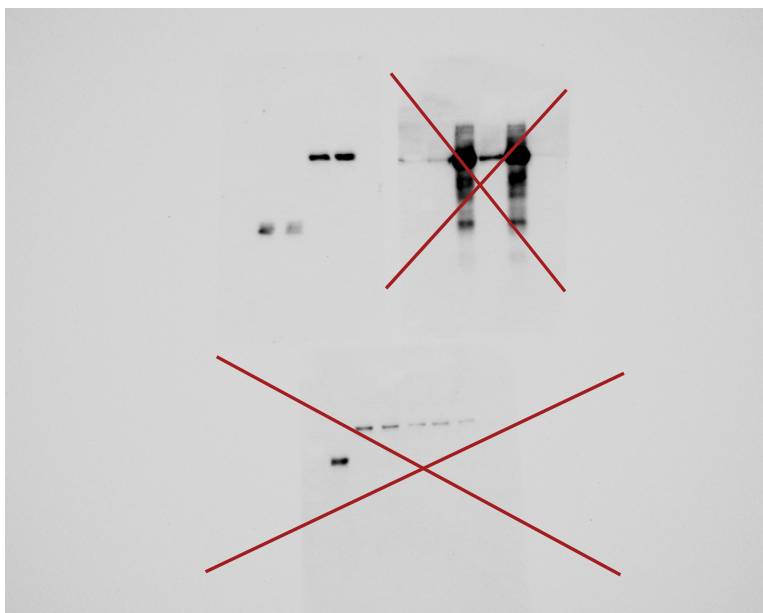

marker

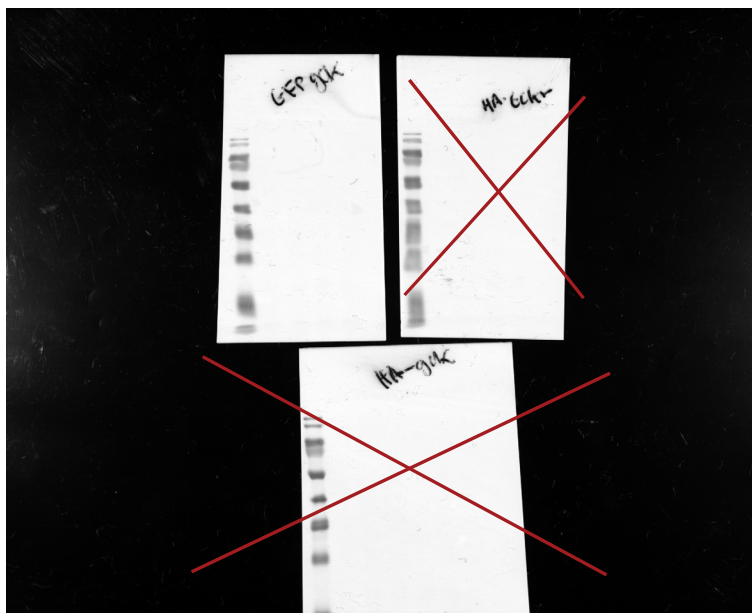

merge

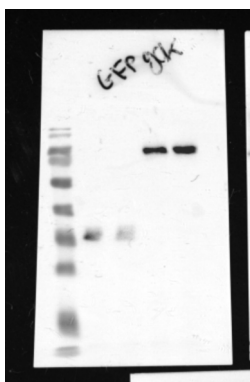

Ponceau S

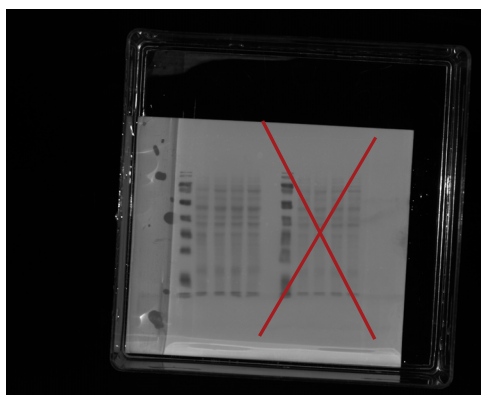

Fig. S2

HA/GKRP

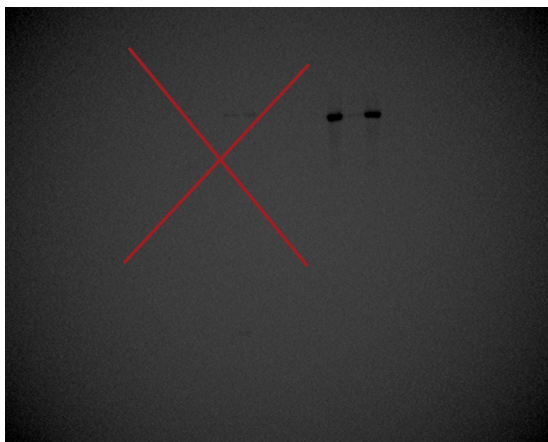

HA/GKRP (enhanced)

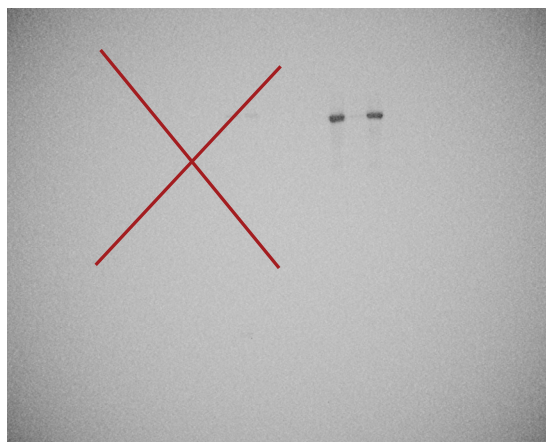

marker

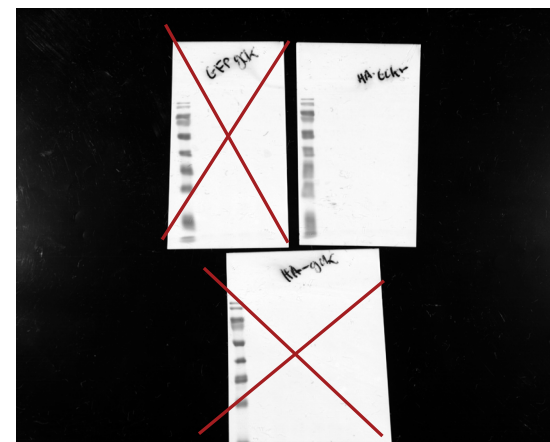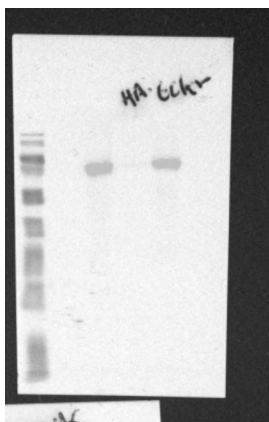

merge

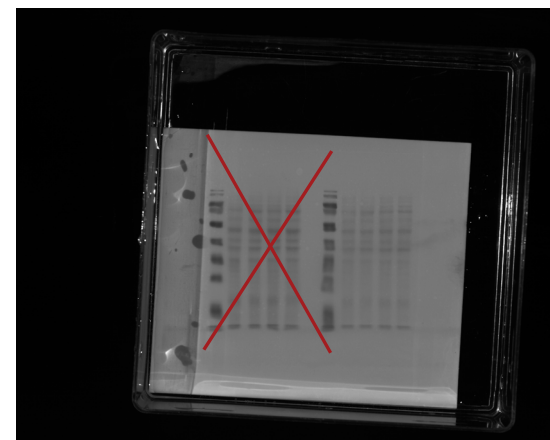

Ponceau S
